# Supplementary material for: Thermal infrared dust optical depth and coarse-mode effective diameter over oceans retrieved from collocated MODIS and CALIOP observations
Source: Copernicus journal article supplement (doi:10.5194/acp-23-8271-2023), 2023-07-25
Supplement: Supplementary file 1 [file acp-23-8271-2023-supplement.pdf]

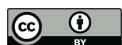

*Supplement of*

## **Thermal infrared dust optical depth and coarse-mode effective diameter over oceans retrieved from collocated MODIS and CALIOP observations**

**Jianyu Zheng et al.**

*Correspondence to:* Zhibo Zhang (zzbatmos@umbc.edu)

The copyright of individual parts of the supplement might differ from the article licence.

## 1 The *a priori* monomodal lognormal volume size distribution

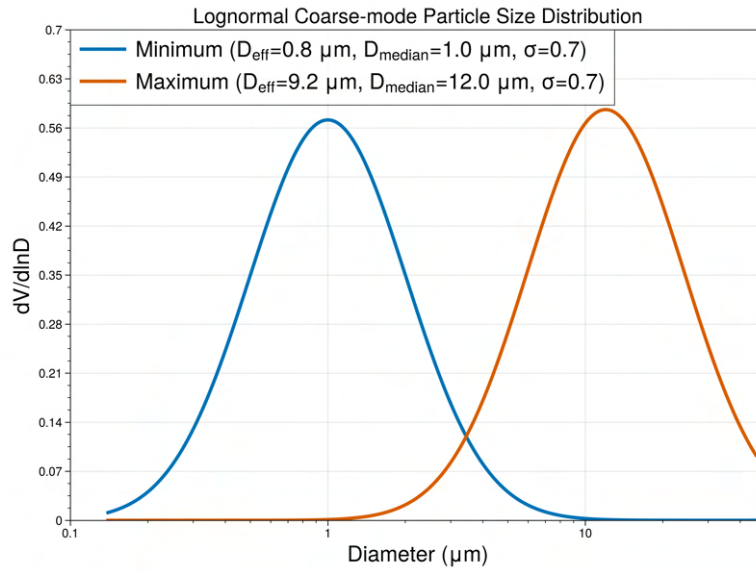

Figure S1: The assumed dust monomodal coarse-mode volume size distribution with the geometric volume median diameter ranging from 1.0  $\mu\text{m}$  to 12.0  $\mu\text{m}$ , the fixed standard deviation at 0.7, and the effective diameter ranging from 0.8  $\mu\text{m}$  to 9.2  $\mu\text{m}$ .

## 2 The refractive index assignment based on the dust source fractional contribution from DustCOMM

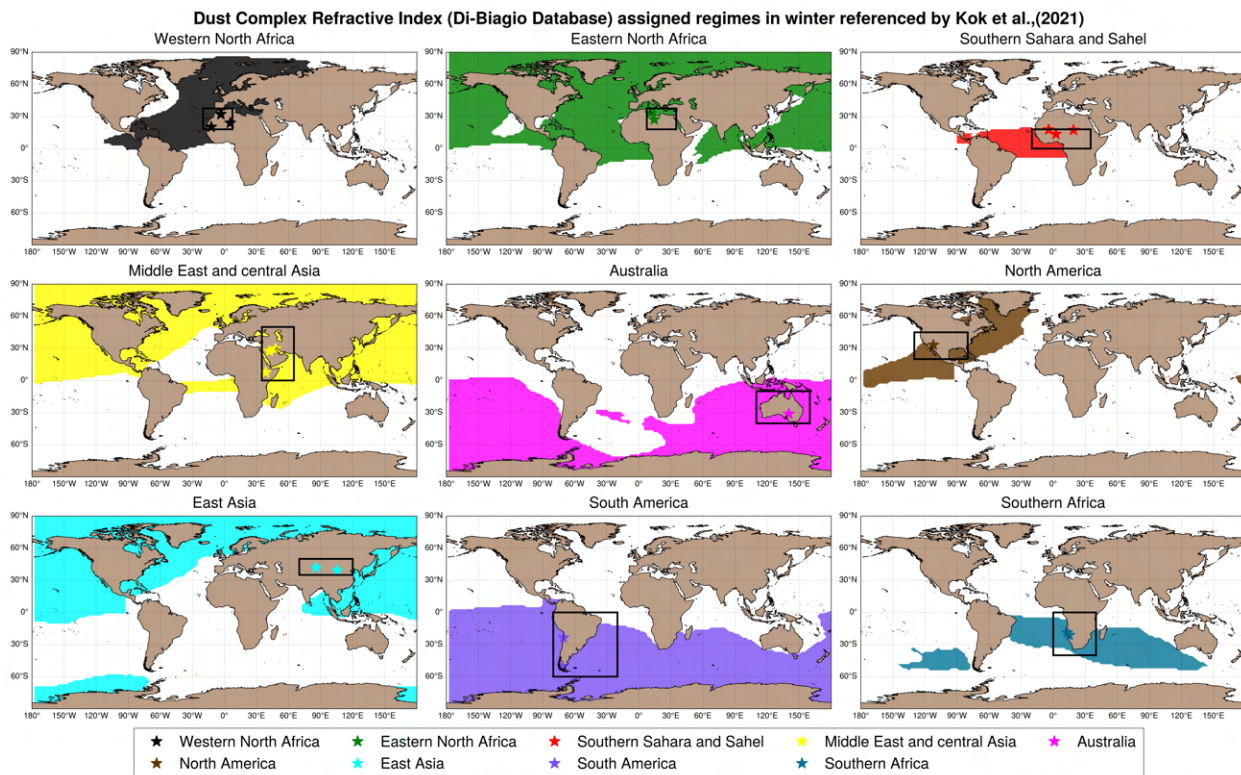

**Figure S2:** The assignment of the source region-resolved dust refractive indices from Di Biagio et al. (2017) is based on which of the nine main source regions provided a fractional contribution to SW DAOD that exceeds 0.1, which is shown here for winter based on the DustCOMM-2021 dataset.

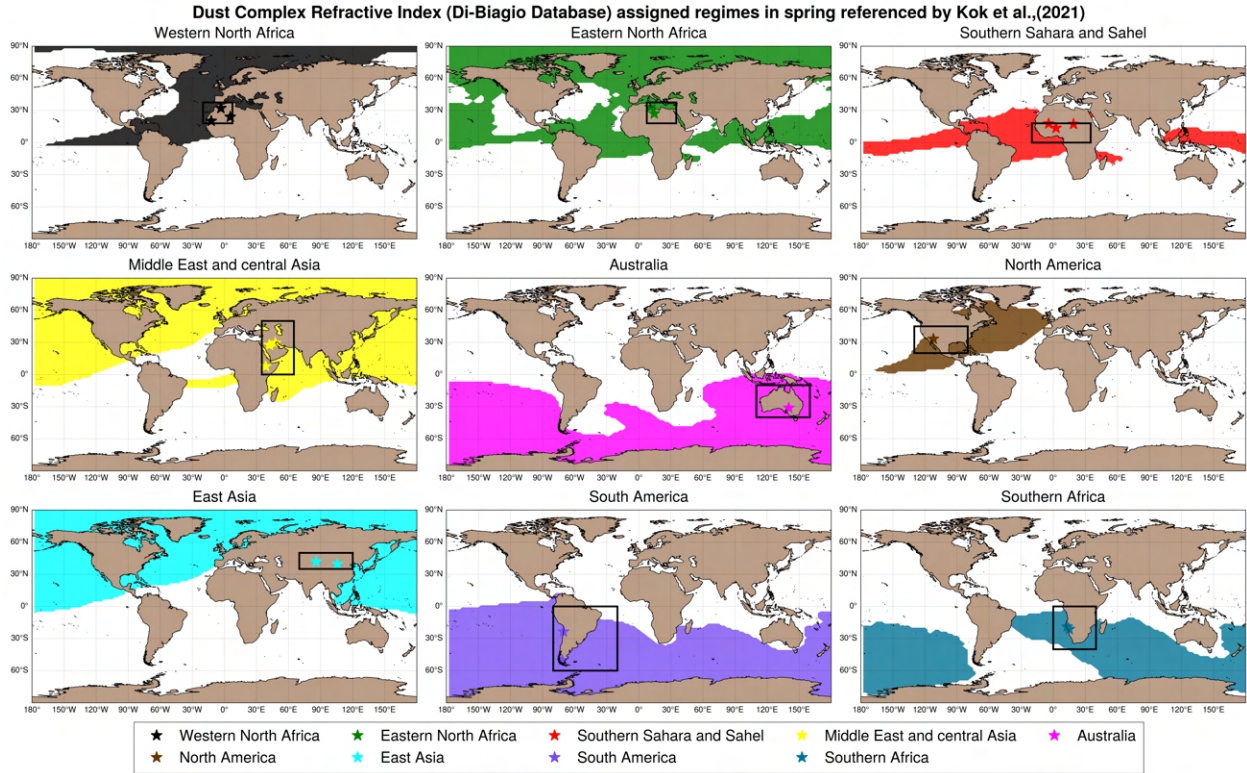

**Figure S3:** Same as Figure S2 but for spring based on the DustCOMM-2021 dataset.

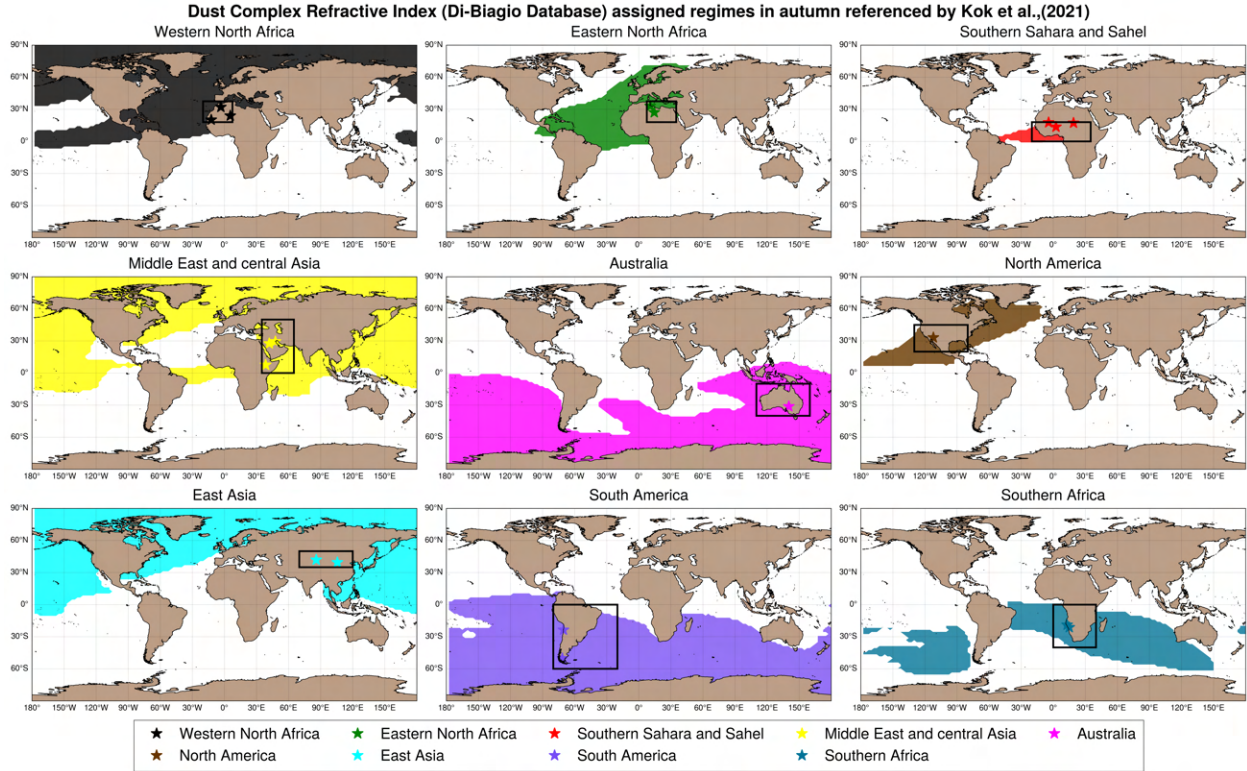

Figure S4: Same as Figure S2 but for autumn based on the DustCOMM-2021 dataset.

### 3 The sensitivity of TIR radiative signature to the $\sigma$ of dust particle size distributions and dust refractive indices

**Dust effective absorption in LW spectrum regarding to  $\sigma$  of PSD with Algeria RI**

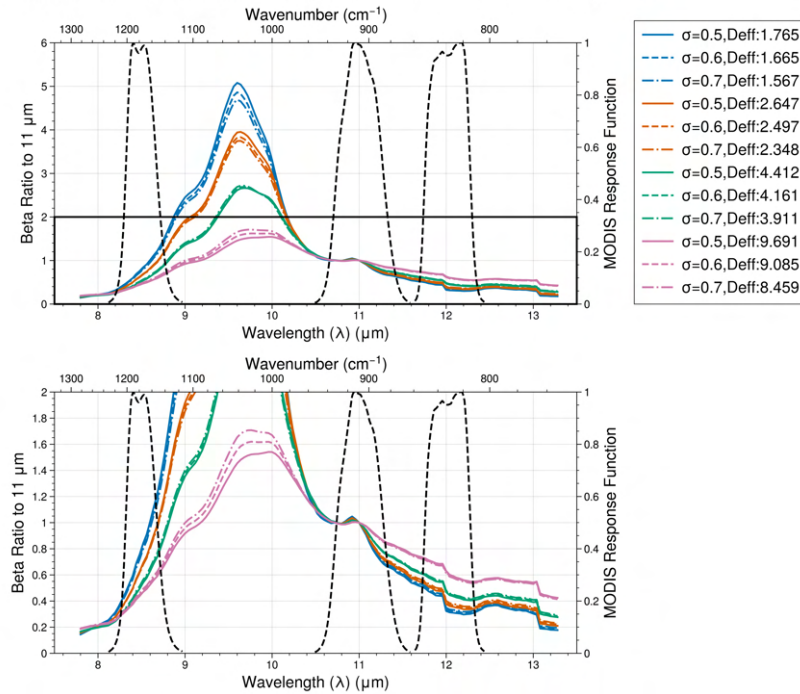

Figure S5: (a) The  $\beta$ -ratio to 11  $\mu\text{m}$  calculated based on  $D_m = 2 \mu\text{m}$  (blue), 3  $\mu\text{m}$  (red), 5  $\mu\text{m}$  (green) and 10  $\mu\text{m}$  (pink) with three different  $\sigma$  (i.e.,  $\sigma = 0.5$  (real curves), 0.6 (dash curves), 0.7 (dot-dash curves)) of dust PSD and the Algeria dust RI

from Di-Biagio Database within the TIR spectrum between 7.5  $\mu\text{m}$  and 13.5  $\mu\text{m}$ . (b) The zoom-in area of the black rectangle in (a).

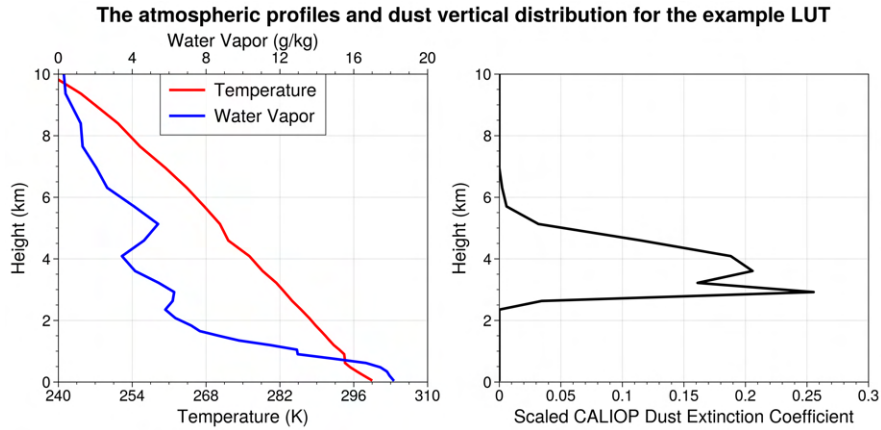

**Figure S6:** The atmospheric profile and dust vertical distribution used for building the LUT in Figure 4 and LUTs in Figures S7 and S8.

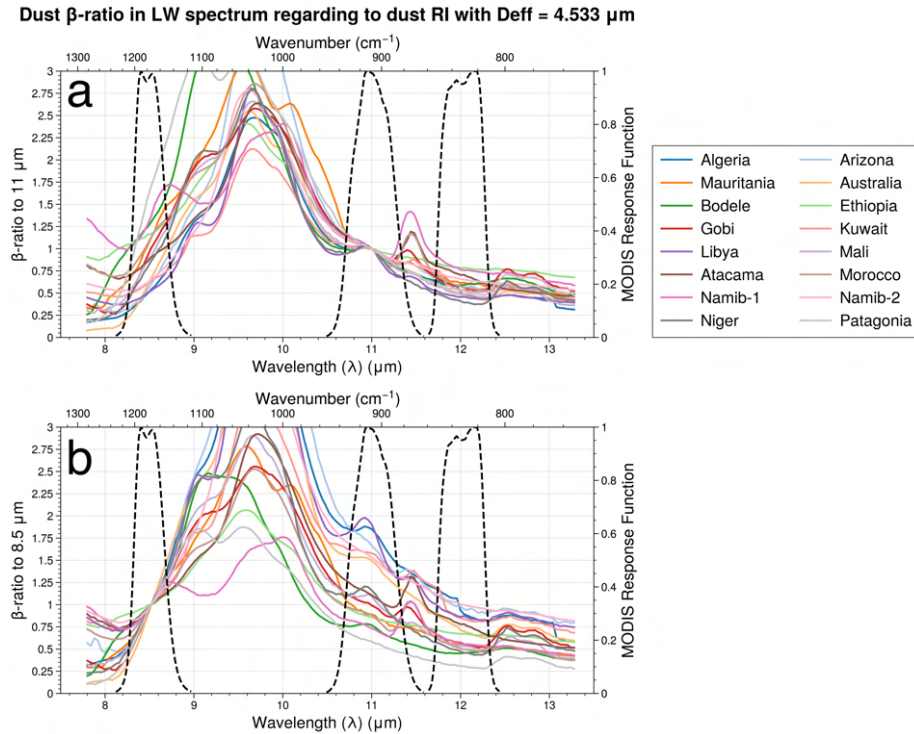

**Figure S7:** (a) The  $\beta$ -ratio to 11  $\mu\text{m}$  calculated based on the dust refractive indices from Di Biagio et al. (2017) and  $D_{\text{eff}} = 4.5 \mu\text{m}$  within the TIR spectrum between 7.5  $\mu\text{m}$  and 13.5  $\mu\text{m}$ . (b) Same as (a) but the  $\beta$ -ratio to 8.5  $\mu\text{m}$ .

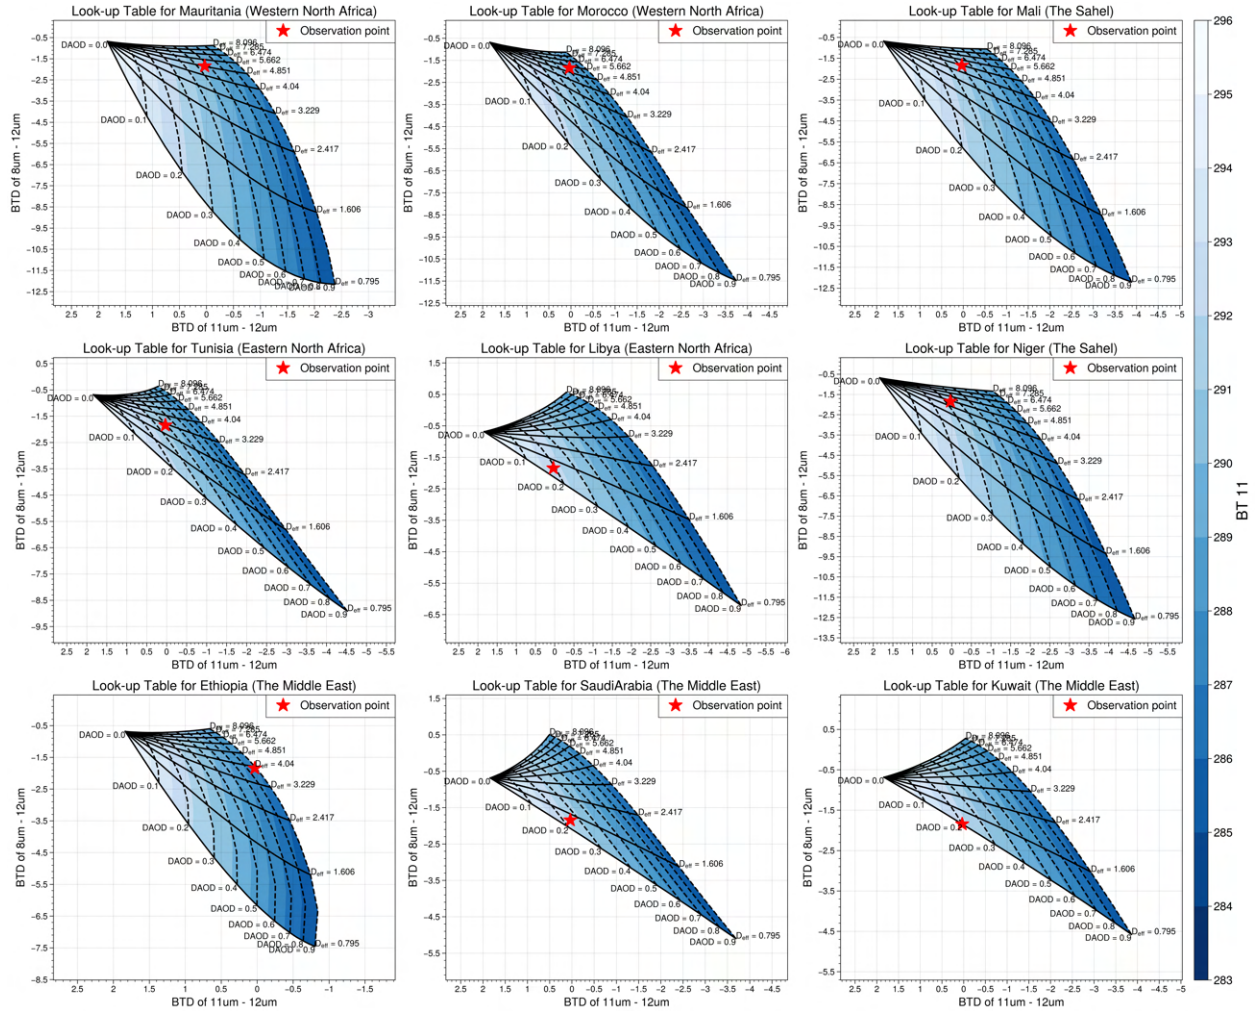

**Figure S8:** The example of the LUT of BT<sub>D<sub>8-12</sub></sub> (y-axis), BT<sub>D<sub>11-12</sub></sub> (x-axis) and BT<sub>11</sub> (colour-filled contours) corresponding to DAOD at 10  $\mu$ m ranging from 0.0 to 1.0 (dashed lines) and D<sub>eff</sub> ranging from 0.8  $\mu$ m to 9.0  $\mu$ m (solid lines) and eighteen dust RIs except the Algeria RI (Figure 2a) from Di-Biagio Database. At DAOD = 0.0, the BT<sub>D<sub>8-12</sub></sub> and BT<sub>D<sub>11-12</sub></sub> correspond to the cloud-free clean scenario. The red dots represent an identical assumed observation point projected on the nine LUTs, leading to different retrieval solutions.

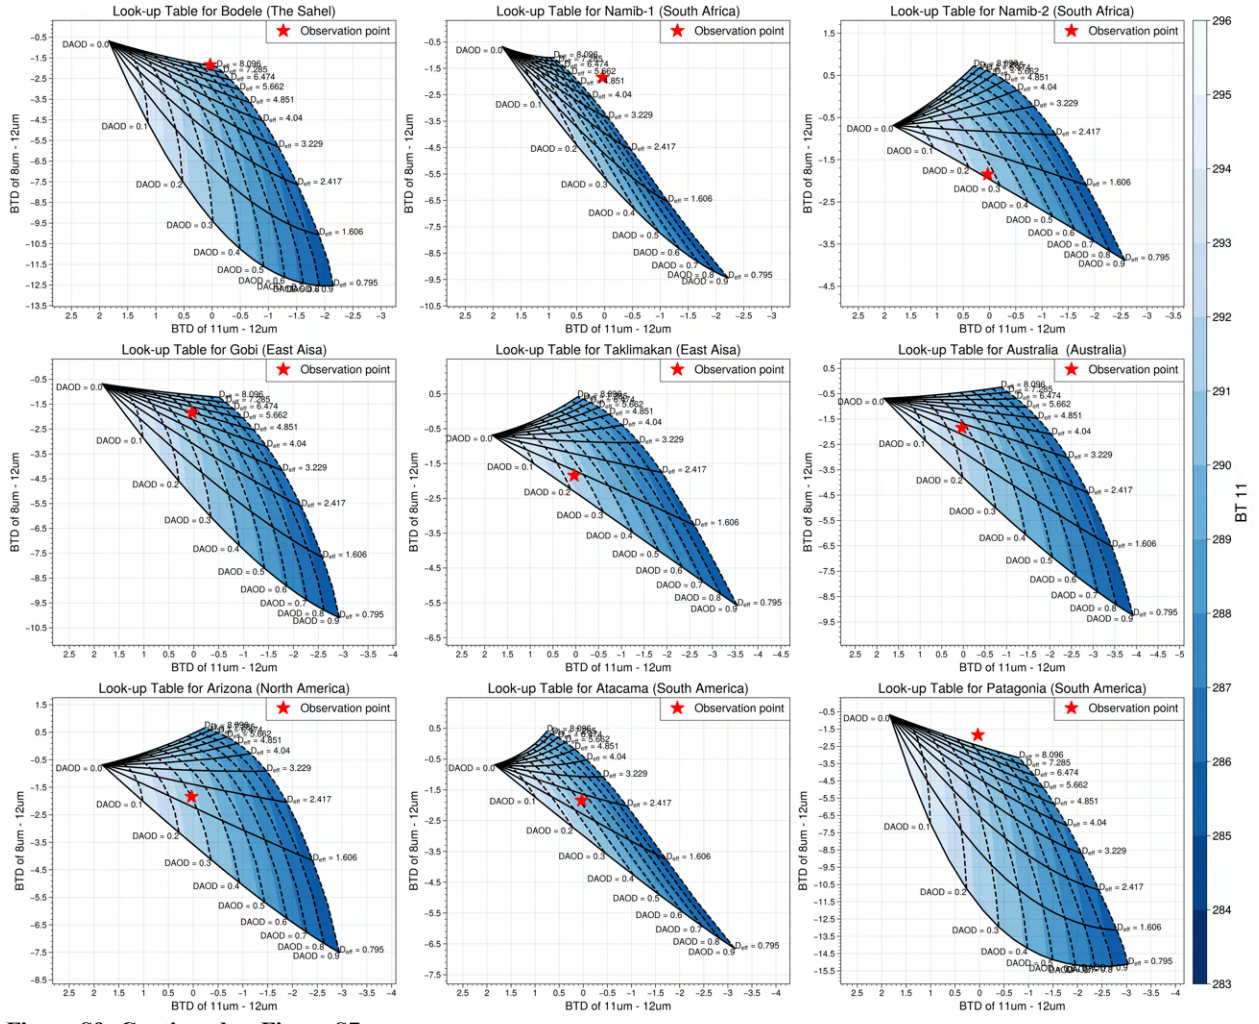

Figure S9: Continued as Figure S7.

#### 4 The sample distributions of the retrieval from 2013 to 2017

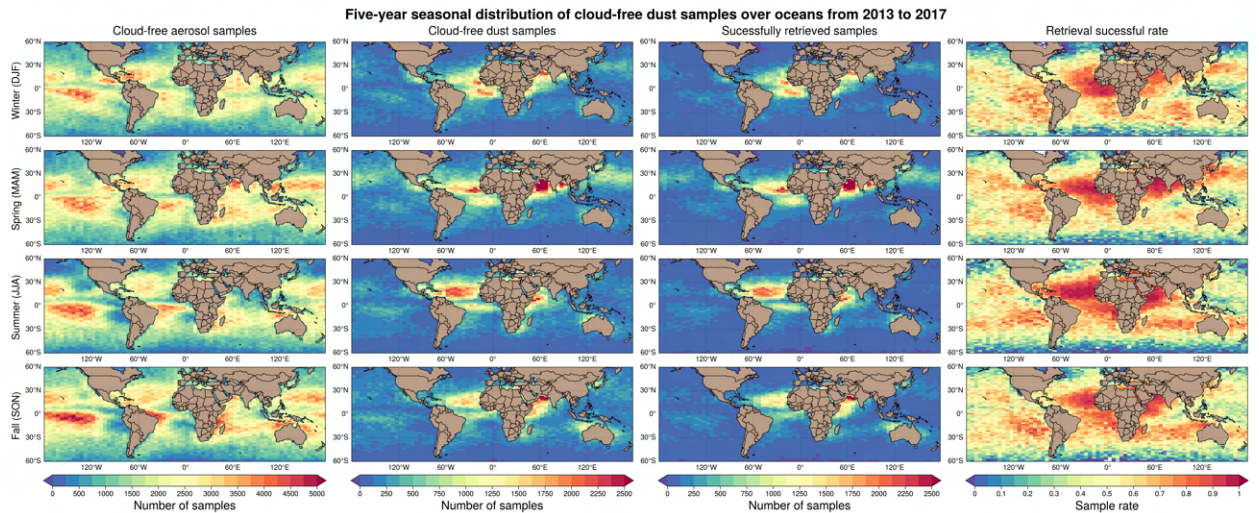

**Figure S10: The five-year global seasonal distribution in a 5° longitude by 2° latitude resolution of the cloud-free aerosol samples ( $N_{aerosol}$ ; left column), the cloud-free aerosol samples ( $N_{dust}$ ; middle-left column), the successfully retrieved samples ( $N_{retrieval}$ ; middle-right column) and the retrieval success rate ( $N_{retrieval} / N_{dust}$ ; right column). From the top row to the bottom presents seasons from winter to fall.**
